# Supplementary material for: Ring-shaped self-assembly of a naphthalene-linked chlorophyll dimer
Source: Royal Society of Chemistry journal article supplement (doi:10.1039/d2cc06368a), 2023-01-01
Supplement: d2cc06368a1.pdf [file d2cc06368a1.pdf]

## Supporting Information

### Ring-shaped self-assembly of naphthalene-linked chlorophyll dimer

Tatsuma Ishii<sup>1</sup>, Shogo Matsubara<sup>1,2\*</sup>, Hitoshi Tamiaki<sup>1\*</sup>

<sup>1</sup> Graduate School of Life Sciences, Ritsumeikan University, Kusatsu, Shiga, 525-8577, Japan

<sup>2</sup> Graduate School of Engineering, Nagoya Institute of Technology, Nagoya, Aichi, 466-8555, Japan

#### Corresponding Authors

E-mail: matsubara.shogo@nitech.ac.jp (S. Matsubara)  
tamiaki@fc.ritsumei.ac.jp (H. Tamiaki)

## 1. Experimental

### 1-1. General

All the reactions were performed in the dark under nitrogen or argon atmosphere and monitored by thin layer chromatography and UV-vis absorption spectroscopy. UV-vis absorption and CD spectra were measured in solution with a 10 mm quartz cell at room temperature using a Hitachi U-3500 spectrophotometer, a Jasco J-720W spectropolarimeter, respectively. FT-IR spectra were recorded on a Shimadzu IRAffinity-1 spectrometer using a KBr cell.  $^1\text{H}$  NMR spectrum was recorded in  $\text{CDCl}_3$  using a JEOL ECA-600 (600 MHz) spectrometer.  $\text{CHCl}_3$  ( $\delta_{\text{H}} = 7.26$  ppm) was used as internal standards. High-resolution mass spectra (HRMS) were recorded on a Bruker micrOTOF II spectrometer; Electrospray ionization (ESI) and positive mode in a  $\text{CHCl}_3$  solution. AFM measurements were performed by a Bruker AXS Multimode 8 AFM system in tapping mode in air at room temperature on an HOPG substrate, and a Bruker silicon cantilever RTESP-300 was used. Dynamic light scattering (DLS) measurements were performed by a Malvern Zetasizer Nano ZS instrument.

### 1-2. Synthesis of chlorophyll dimer 1

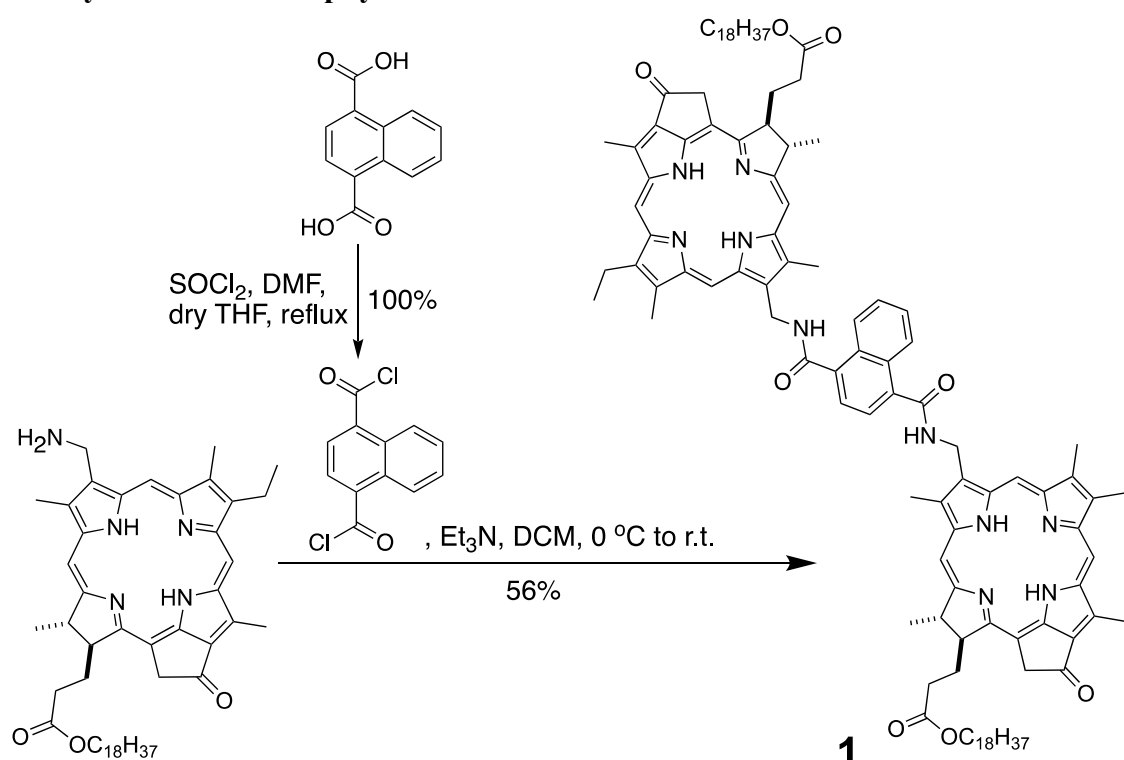

A mixture of 1,4-naphthalenedicarboxylic acid (40.3 mg, 186  $\mu\text{mol}$ ),  $\text{SOCl}_2$  (100  $\mu\text{L}$ , 1.38 mmol), and a catalytic amount of *N,N*-dimethyl formamide (DMF) in 10 mL of dry tetrahydrofuran (THF) was refluxed for 3 h. After cooling down to room temperature,  $\text{SOCl}_2$ , DMF, and THF were

removed *in vacuo* to give 1,4-naphthalenedicarboxyl dichloride (46.5 mg, 184  $\mu\text{mol}$ , 100%). The product (4.7 mg, 18.6  $\mu\text{mol}$ ) was dissolved in 10 mL of dichloromethane (DCM), to which were added to stearyl 3-aminomethyl-pyropheophorbide-*a*<sup>S1</sup> (31.1 mg, 39.4  $\mu\text{mol}$ ) and Et<sub>3</sub>N (26.4  $\mu\text{L}$ , 189  $\mu\text{mol}$ ) at 0 °C. After stirring for 1 day at room temperature, the reaction mixture was quenched by addition of a water, extracted by DCM, washed with water, and dried over Na<sub>2</sub>SO<sub>4</sub>. After evaporating the solvent, the residue was purified by silica gel chromatography to give **1** as a black solid (18.3 mg, 10.4  $\mu\text{mol}$ , 56%); mp >300 °C; UV-vis (CHCl<sub>3</sub>)  $\lambda_{\text{max}}$  = 666 (relative intensity, 0.54), 609 (0.08), 538 (0.09), 508 (0.10), 412 (1.00), 400 (0.82), 381 (0.60), 319 nm (0.23); <sup>1</sup>H NMR (CDCl<sub>3</sub>, 50 °C, 600 MHz)  $\delta_{\text{H}}$ /ppm = 9.22 (2H, s, 5-H $\times$ 2), 9.17 (2H, s, 10-H $\times$ 2), 8.38 (2H, s, 20-H $\times$ 2), 8.32/8.31 (2H, d, *J* = 6 Hz, 5,8-H of naphthalene), 7.338/7.343 (2H, d, *J* = 6 Hz, 6,7-H of naphthalene), 7.29 (2H, s, 2,3-H of naphthalene), 6.73 (2H, br, 3<sup>1</sup>-NH $\times$ 2), 5.50 (4H, br, 3-CH<sub>2</sub> $\times$ 2), 5.18, 5.03 (each 2H, d, *J* = 18 Hz, 13<sup>1</sup>-CH<sub>2</sub> $\times$ 2), 4.33 (2H, br-q, *J* = 7 Hz, 18-H $\times$ 2), 4.13 (2H, br-d, *J* = 9 Hz, 17-H $\times$ 2), 4.04–3.94 (4H, m, 17<sup>2</sup>-COOCH<sub>2</sub> $\times$ 2), 3.44 (4H, q, *J* = 8 Hz, 8-CH<sub>2</sub> $\times$ 2), 3.39 (6H, s, 12-CH<sub>3</sub> $\times$ 2), 3.21 (6H, s, 2-CH<sub>3</sub> $\times$ 2), 3.02 (6H, s, 7-CH<sub>3</sub> $\times$ 2), 2.59–2.50, 2.49–2.42, 2.26–2.16, 2.11–2.00 (each 2H, m, 17-CH<sub>2</sub>CH<sub>2</sub> $\times$ 2), 1.70 (6H, d, *J* = 7 Hz, 18-CH<sub>3</sub> $\times$ 2), 1.51 (6H, t, *J* = 8 Hz, 8<sup>1</sup>-CH<sub>3</sub> $\times$ 2), 1.30–1.19 (60H, m, 17<sup>2</sup>-COOC<sub>2</sub>(CH<sub>2</sub>)<sub>15</sub> $\times$ 2), 0.87 (6H, t, *J* = 7 Hz, 17<sup>2</sup>-COOC<sub>17</sub>CH<sub>3</sub> $\times$ 2), –2.02 (2H, br-s, NH $\times$ 2) [The proton signals of the 17<sup>2</sup>-COOCCH<sub>2</sub> and the other NH in macrocycle were overlapped with proton peaks of water and tetramethylsilane, respectively.]; <sup>13</sup>C NMR (CDCl<sub>3</sub>, 50 °C, 151 MHz)  $\delta_{\text{C}}$ /ppm = 195.6, 173.0, 171.2, 168.5, 154.9, 151.0, 148.9, 145.0, 142.8, 136.6, 133.7, 133.5, 130.8, 130.5, 128.6, 127.6, 127.3, 125.7, 123.8, 106.4, 104.0, 100.8, 100.7, 97.9, 96.5, 93.0, 64.9, 51.9, 49.9, 48.0, 34.8, 31.9, 31.3, 29.8, 29.7, 29.63, 29.60, 29.55, 29.47, 29.41, 29.33, 29.19, 28.6, 25.9, 23.0, 22.7, 19.5, 19.4, 17.2, 14.0, 11.8, 11.13, 11.10 [Three <sup>13</sup>C peaks in the 17<sup>2</sup>-octadecyl moiety were overlapped with the others.]; HRMS (ESI) found: *m/z* = 1761.1429 and 881.0752, calcd for C<sub>112</sub>H<sub>146</sub>N<sub>10</sub>O<sub>8</sub>: [M+H]<sup>+</sup>, 1761.1432, [M+H<sub>2</sub>]<sup>2+</sup>, 881.0752.

### 1-3. Preparation of the samples for UV-vis absorption and CD spectroscopies

Twenty nmol of chlorophyll dimer **1** was dissolved in CHCl<sub>3</sub> (2000 or 100  $\mu\text{L}$ ) to give low- or high-concentrated solution, respectively. The low-concentrated CHCl<sub>3</sub> solution (10  $\mu\text{M}$ ) was used as the sample of monomeric **1** for UV-vis absorption and CD spectroscopies. The high-concentrated CHCl<sub>3</sub> solution of **1** (100  $\mu\text{L}$ ) was diluted with 1900  $\mu\text{L}$  of hexane to give the sample of assembled **1** in 5%(v/v) CHCl<sub>3</sub>–hexane (10  $\mu\text{M}$ ).

### 1-4. Preparation of the samples for FT-IR spectroscopy

Similarly as mentioned in section 1-3, 1 mM solution and dispersion of **1** in CHCl<sub>3</sub> and 5%(v/v) CHCl<sub>3</sub>–hexane, respectively, were prepared. The CHCl<sub>3</sub> solution and 5%(v/v) CHCl<sub>3</sub>–hexane

dispersion were injected to a sealed liquid cell with KBr windows to give the samples of monomeric and assembled **1** for FT-IR spectroscopy, respectively.

#### **1-5. Preparation of the AFM samples**

Similarly as mentioned in section 1-3, 1, 10, and 100  $\mu\text{M}$  dispersion of assembled **1** in 5%(v/v)  $\text{CHCl}_3$ –hexane were prepared. The 5%(v/v)  $\text{CHCl}_3$ –hexane dispersions were casted on an HOPG substrate and spin-coated using a MIKASA Opticoat MS-B 100 (2000 rpm) to give the AFM sample.

## 2. Spectral data of 1

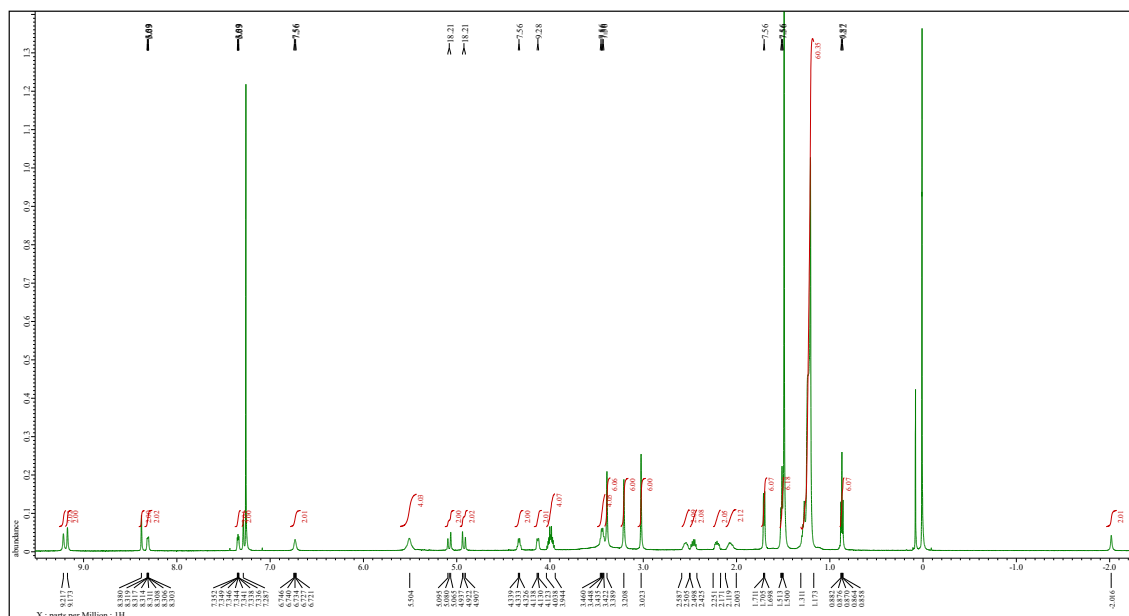

**Figure S1.**  $^1\text{H}$  NMR spectrum of **1** in  $\text{CDCl}_3$  at 50  $^\circ\text{C}$ .

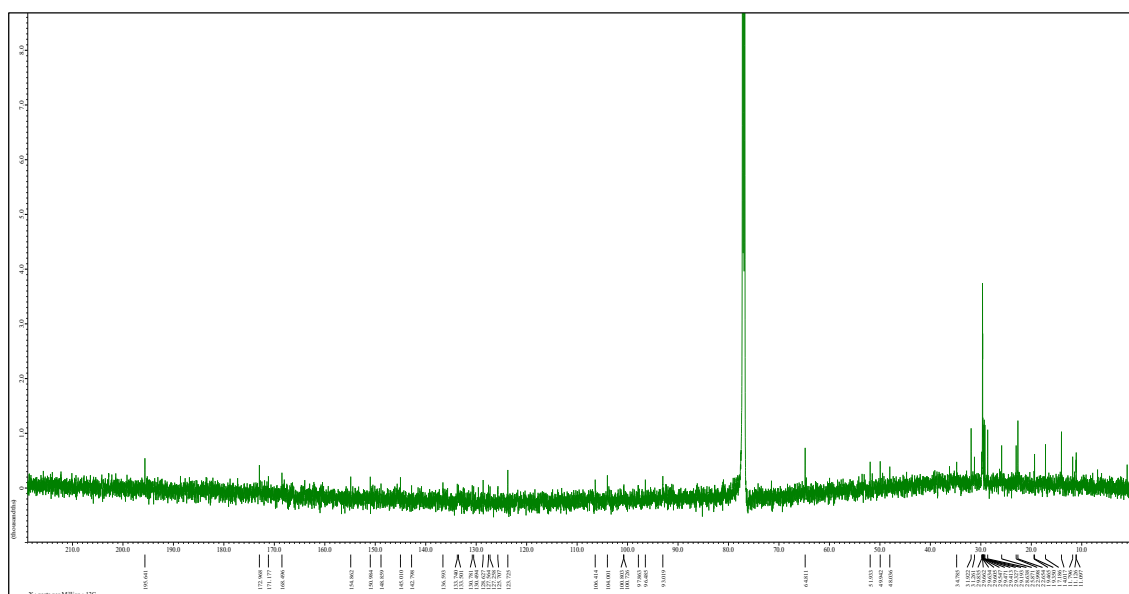

**Figure S2.**  $^{13}\text{C}$  NMR spectrum of **1** in  $\text{CDCl}_3$  at 50  $^\circ\text{C}$ .

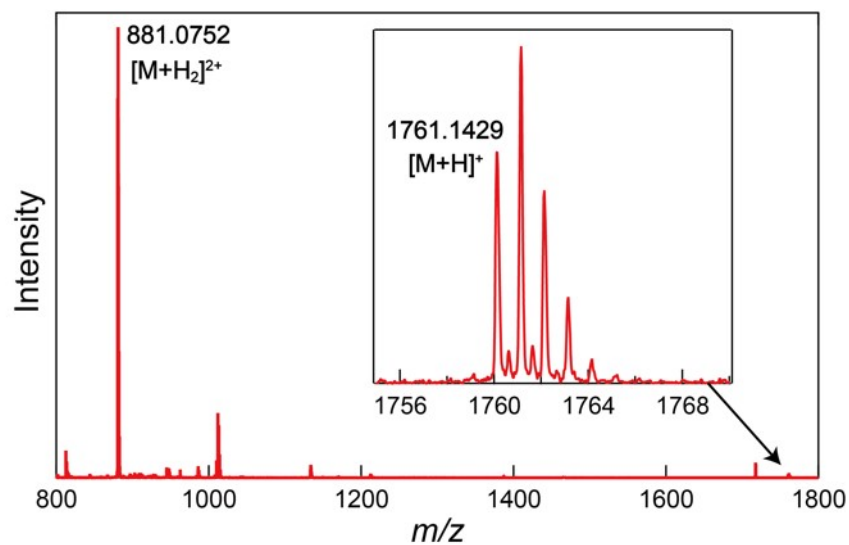

**Figure S3.** ESI-TOF mass spectrum of **1**.

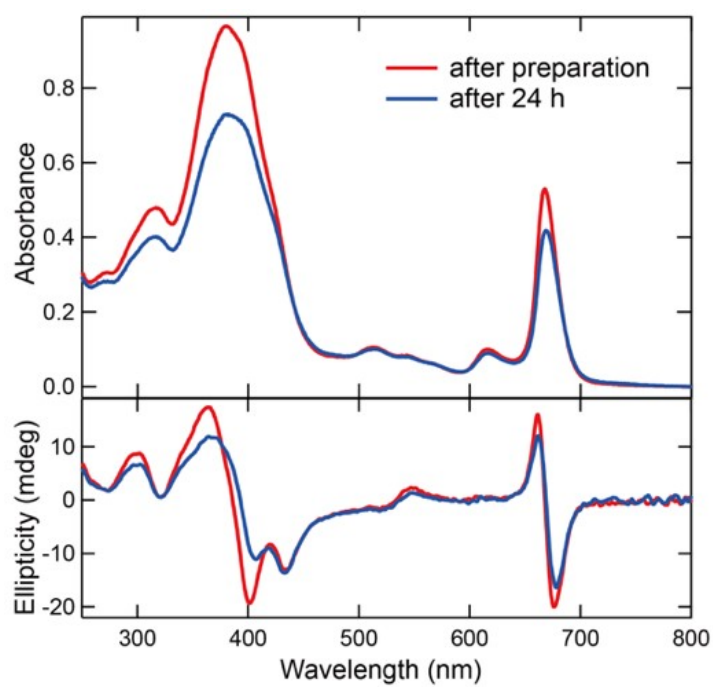

**Figure S4.** UV-vis absorption (upper) and CD spectra (lower) of **1** (10  $\mu$ M) in 5%(v/v)  $CHCl_3$ -hexane just after preparation (red) and after standing for 24 h (blue).

### 3. Size of the nanorings

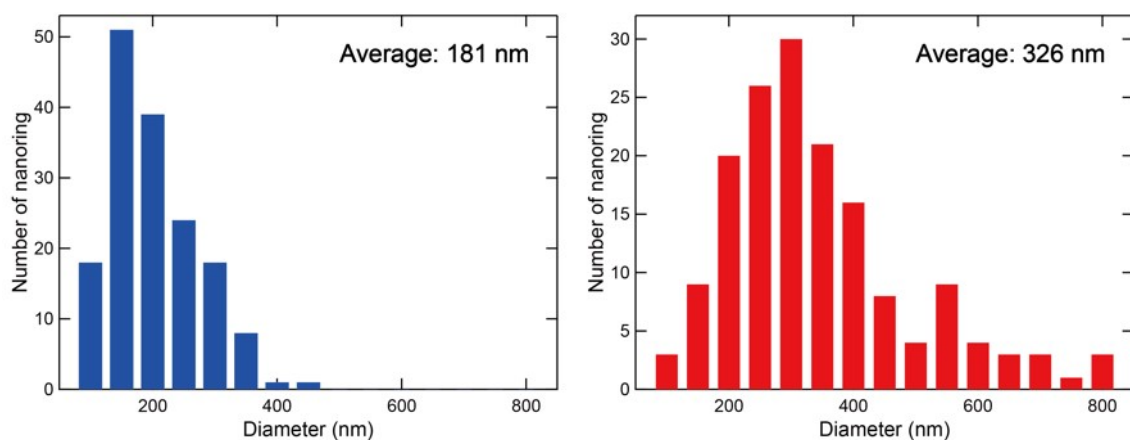

**Figure S5.** The distribution histograms of the short (left, blue) and long axes of the nanorings (right, red) evaluated by AFM images.

**Table S1.** The numbers of nanofibers and nanorings counted from each two AFM images ( $5 \times 5 \mu\text{m}$ ) of assembled dimer **1** after standing the sample for 0, 3, 6, 12, and 24 h and the number ratios of nanorings over nanostructures observed.

| Sample standing<br>hour | Number of<br>nanofibers | Number of<br>nanorings | Ratio of nanorings<br>over nanostructures |
|-------------------------|-------------------------|------------------------|-------------------------------------------|
| 0                       | 113                     | 3                      | 3%                                        |
| 3                       | 133                     | 22                     | 14%                                       |
| 6                       | 113                     | 29                     | 20%                                       |
| 12                      | 56                      | 44                     | 44%                                       |
| 24                      | 45                      | 64                     | 59%                                       |

#### 4. Additional AFM images

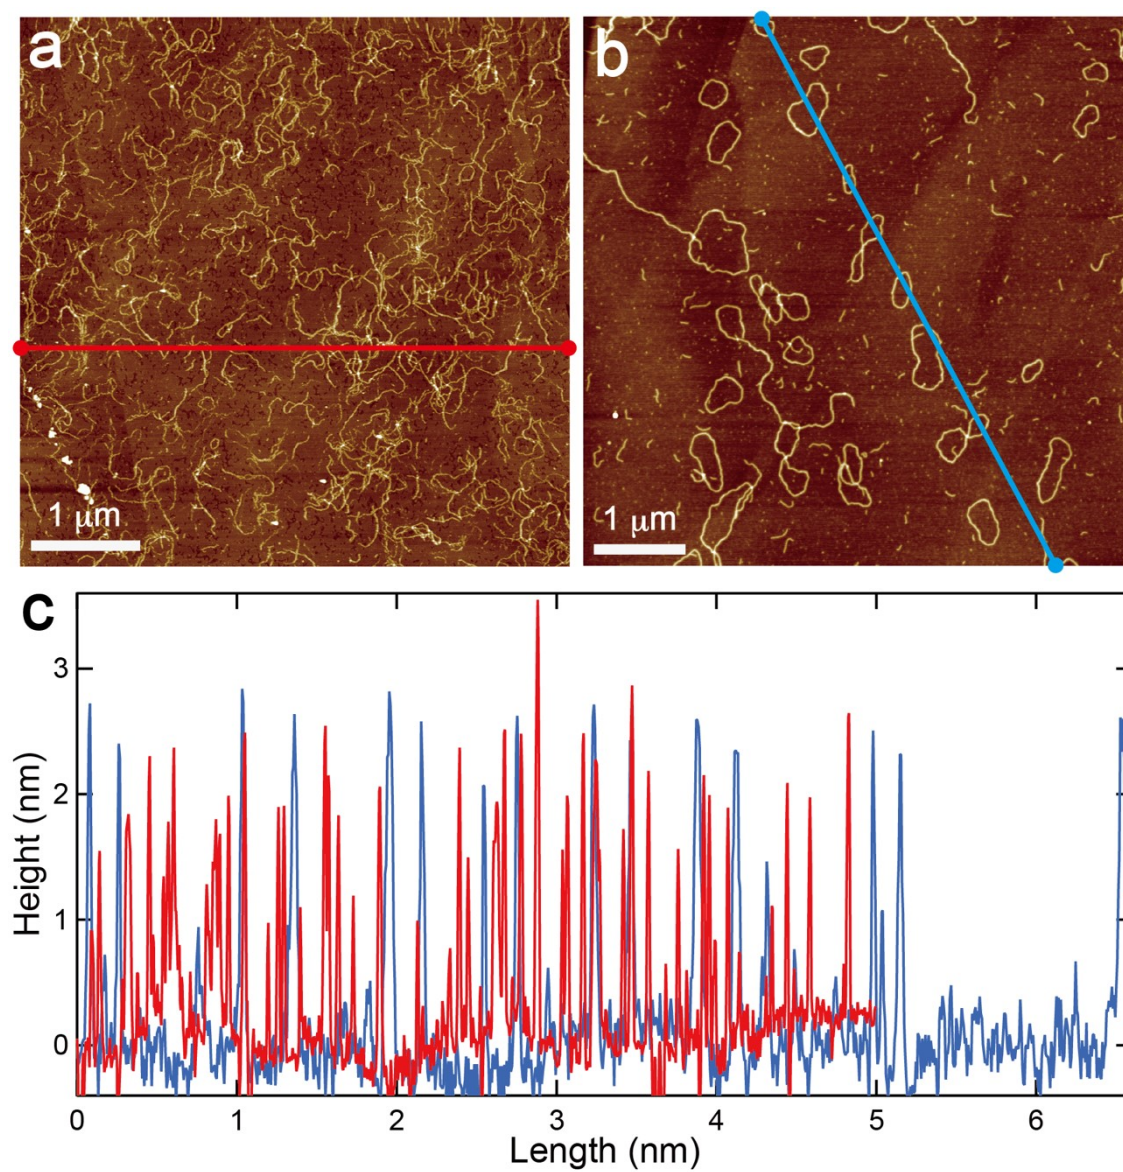

**Figure S6.** AFM images of nanofibers (a) and nanorings (b). The concentration of **1** in AFM samples was 10  $\mu\text{M}$ . All the white bars show a 1  $\mu\text{m}$  length. (c) Height profiles along the red-line in Figure S6a and blue-line in Figure S6b.



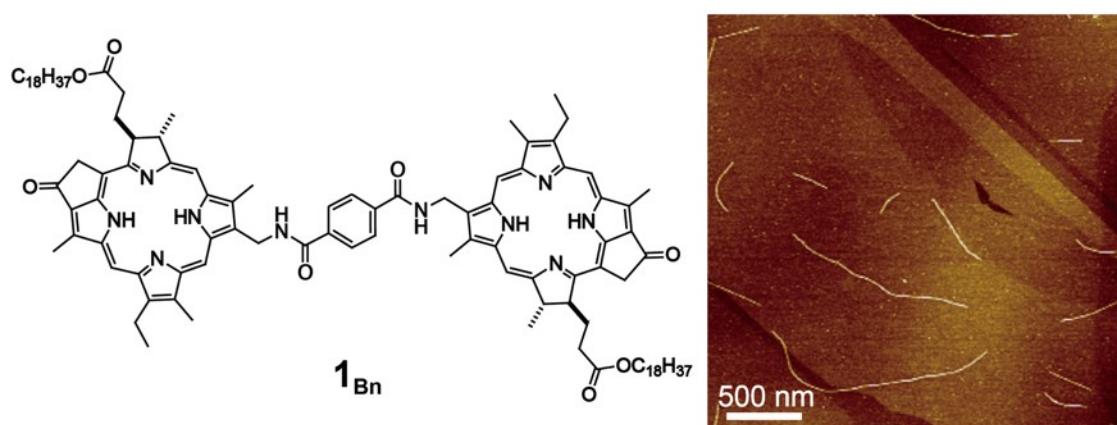

**Figure S7.** Chemical structure of benzene-like chlorophyll dimer **1<sub>Bn</sub>** (left) and AFM image of assembled **1<sub>Bn</sub>** on an HOPG substrate (right).

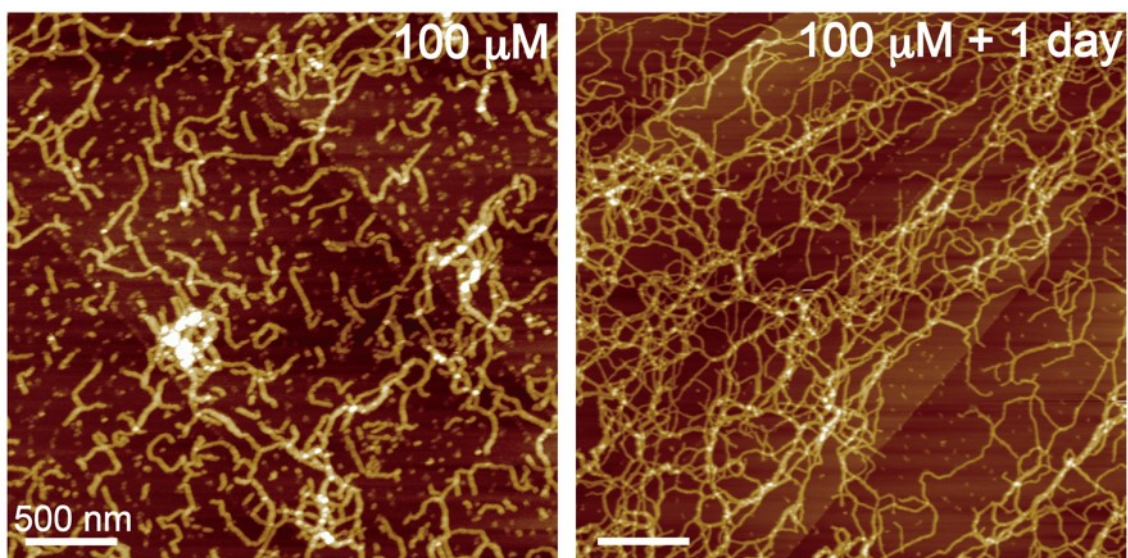

**Figure S8.** AFM images of assembled dimer **1** (100 μM) after standing the suspension for 0 h (left) and 1 day (right). All the bars show a 500 nm length.

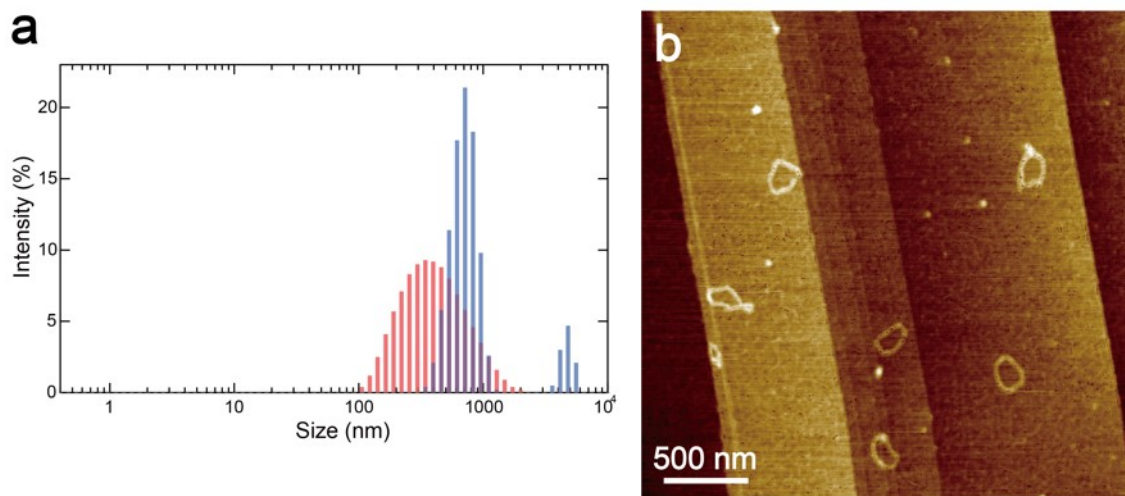

**Figure S9.** (a) DLS size distributions of self-aggregates of **1** (10  $\mu$ M) before (blue) and after filtration using a membrane filter with a 0.45  $\mu$ m pore (red). (b) AFM image of 1-day stood dispersion of assembled **1** (10  $\mu$ M) after filtration by using a membrane filter with a 0.45  $\mu$ m pore.

#### 4. Reference

- S1. S. Matsubara, H. Tamiaki, Supramolecular Nanofibers Constructed by Hydrogen Bonding of Chlorophyll Dimer. *Chem. Lett.*, 2021, **50**, 999-1001.
